# Supplementary material for: Recognition of 3′ nucleotide context and stop codon readthrough are determined during mRNA translation elongation
Source: PubMed Central journal article supplement — J Biol Chem. 2022 Jun 11;298(7):102133. doi: 10.1016/j.jbc.2022.102133 (PMC9272376; doi:10.1016/j.jbc.2022.102133), 2022-06-11
Supplement: mmc1.pdf [file mmc1.pdf]

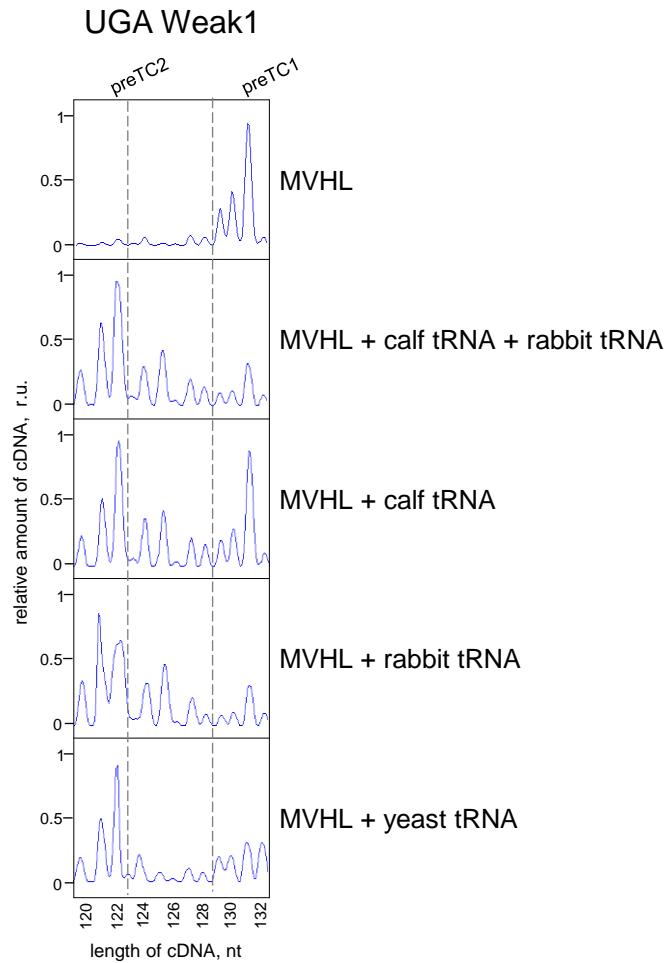

Figure S1. Stop codon readthrough on the UGA stop codon in the Weak1 context after addition of the aminoacylated tRNA from various sources: calf, rabbit, and yeast. Examples of toe-printing analysis of the ribosomal complexes. r.u., relative units.

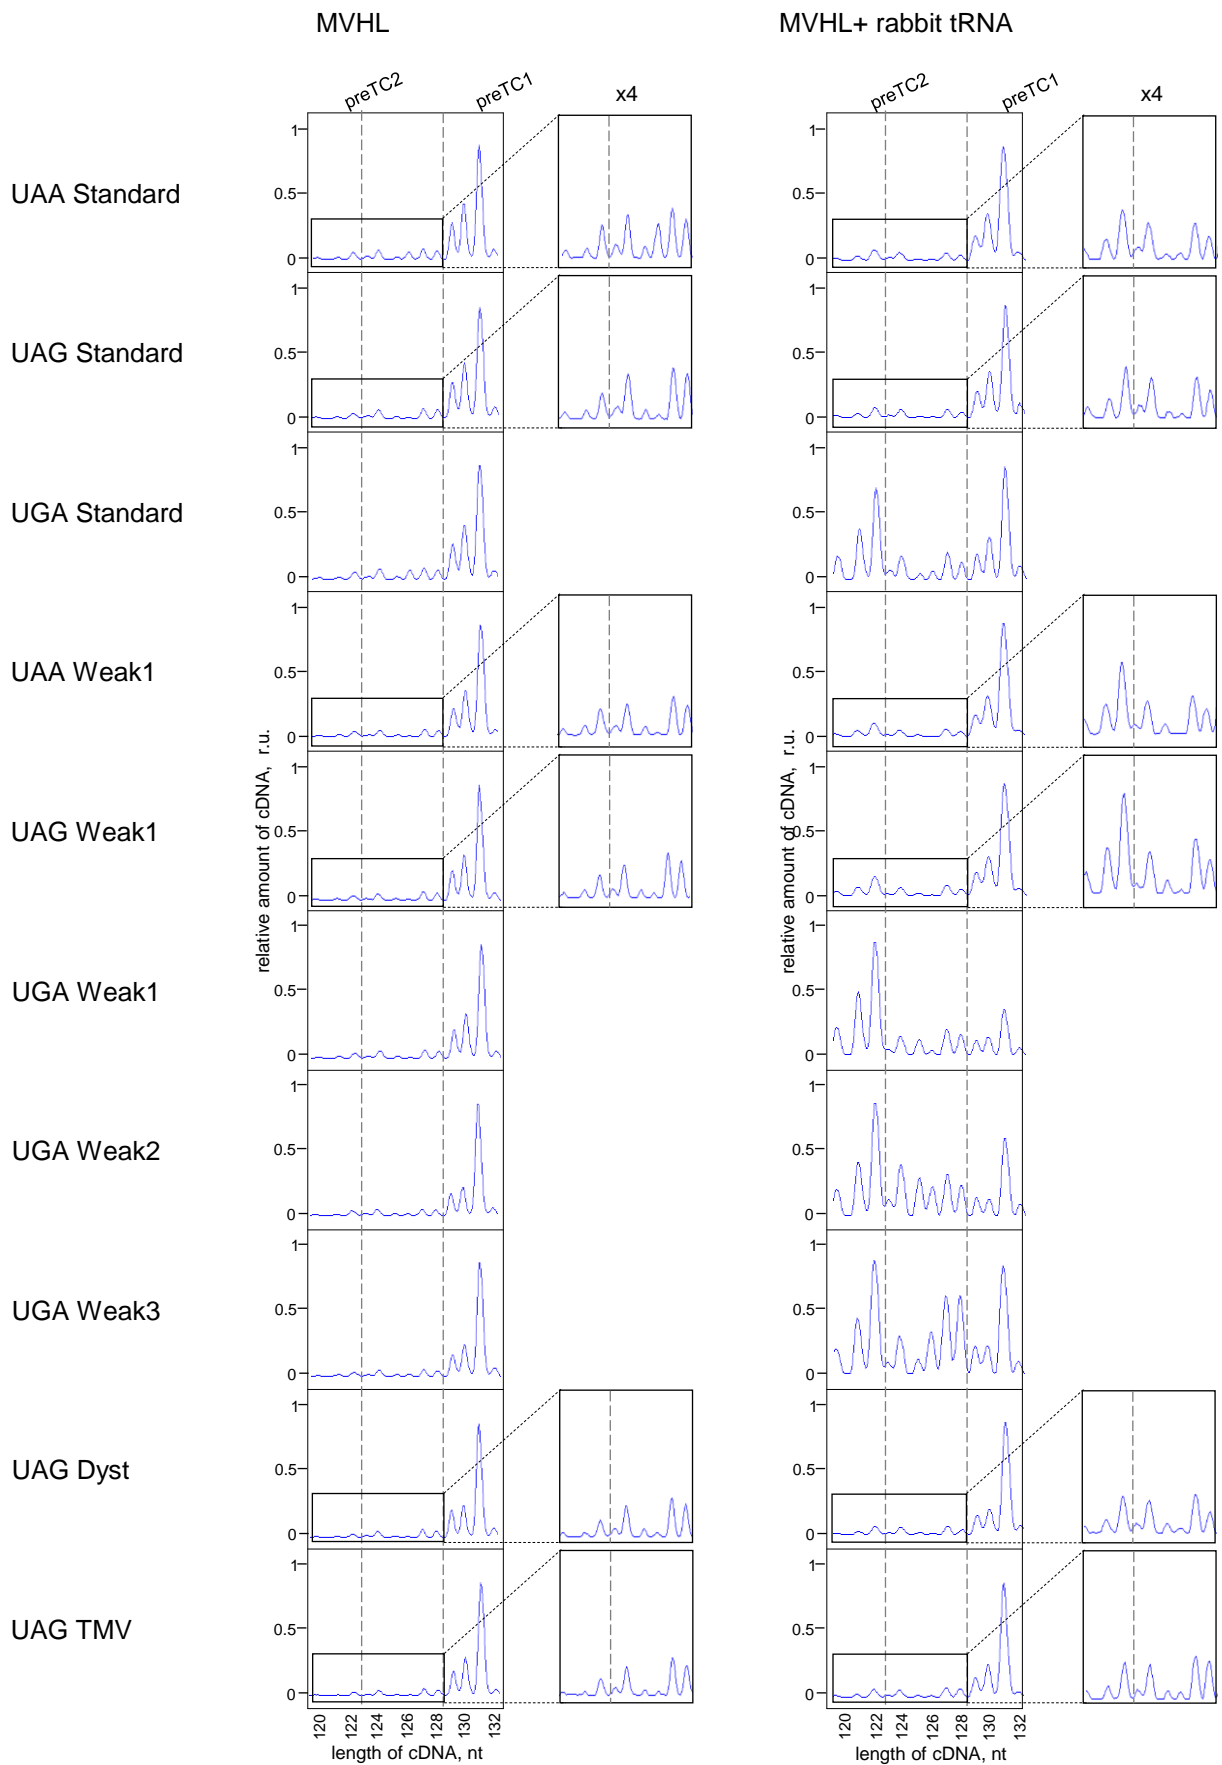

Figure S2. Examples of toe-printing analysis of stop codon readthrough on different stop codons and in different 3' contexts. r.u., relative units.

MVHL

MVHL+ rabbit tRNA

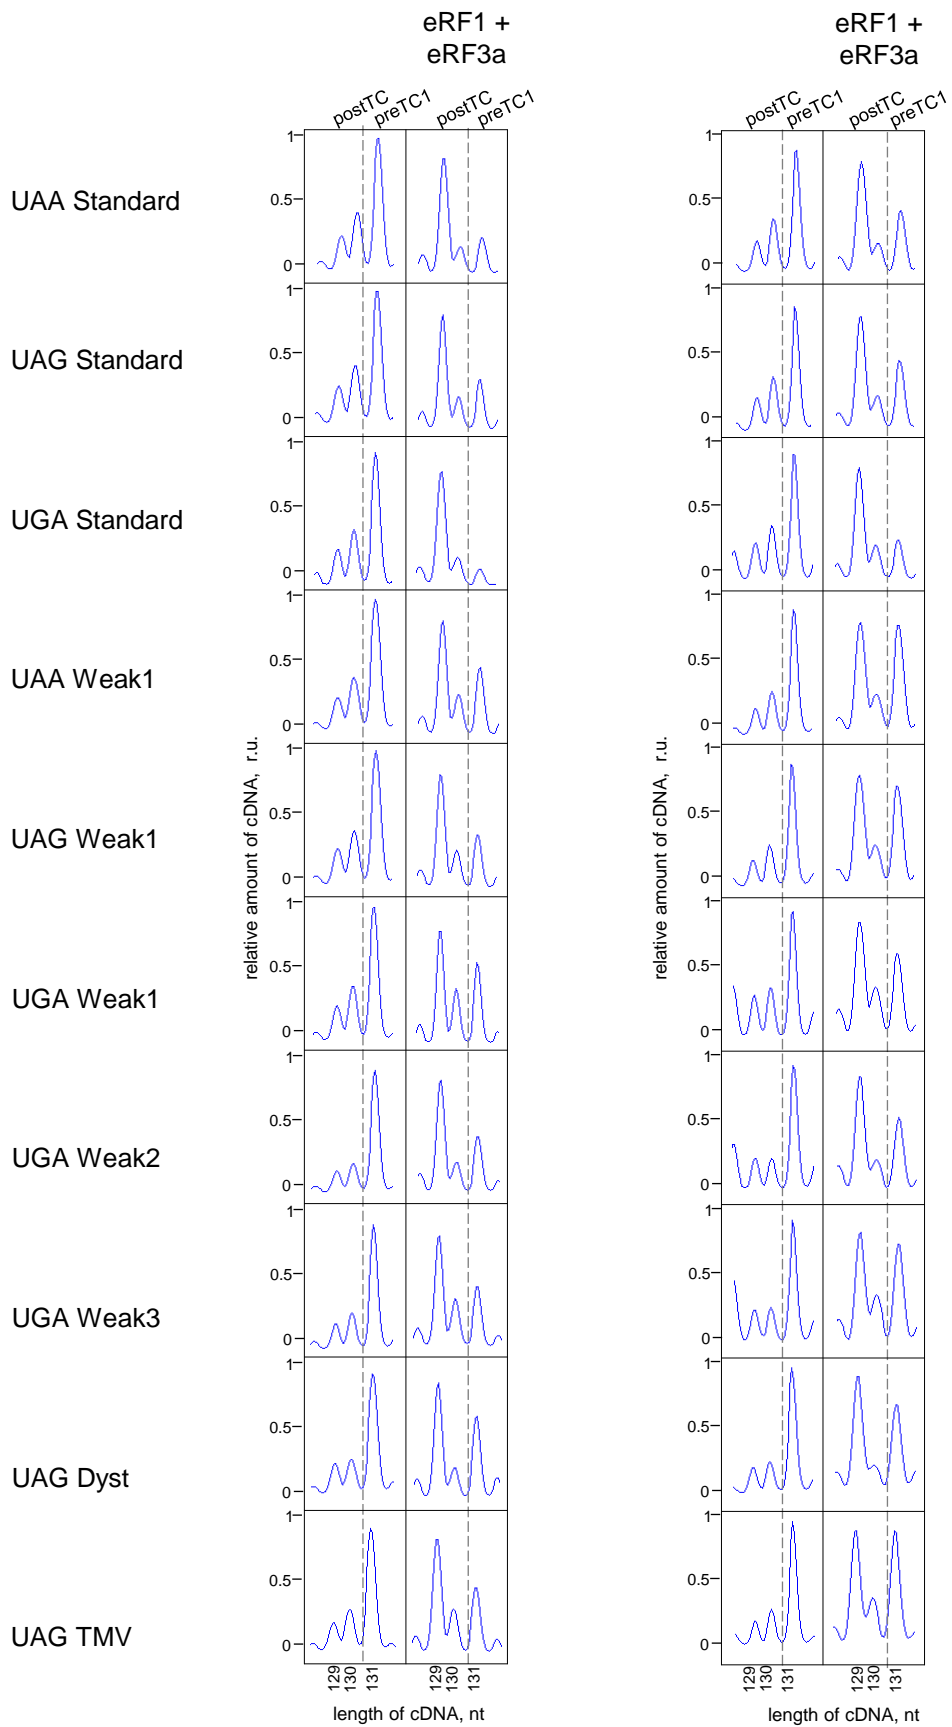

Figure S3. Examples of toe-printing analysis of translation termination on different stop codons and in different 3' context. r.u., relative units.

# Raw data for Fig 1C

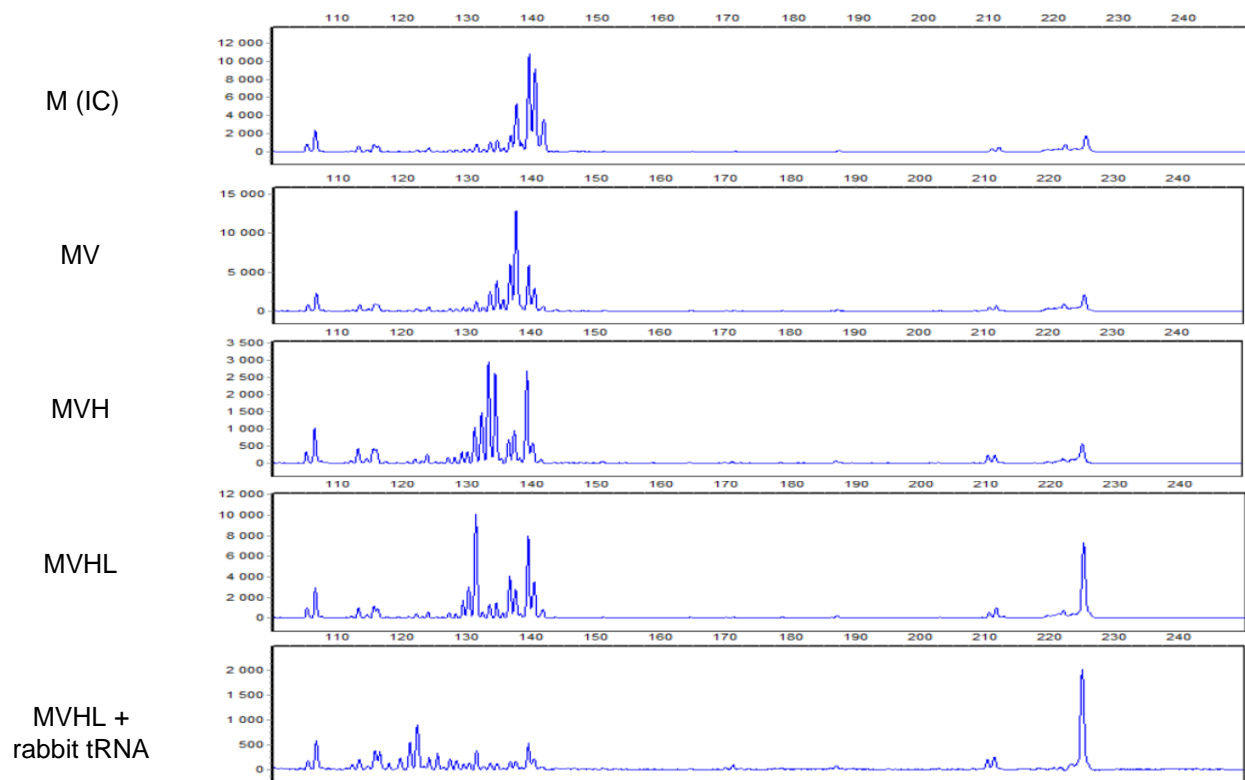

Figure S4. Examples of raw data for all toe-printing experiments.

# Raw data for Fig 4

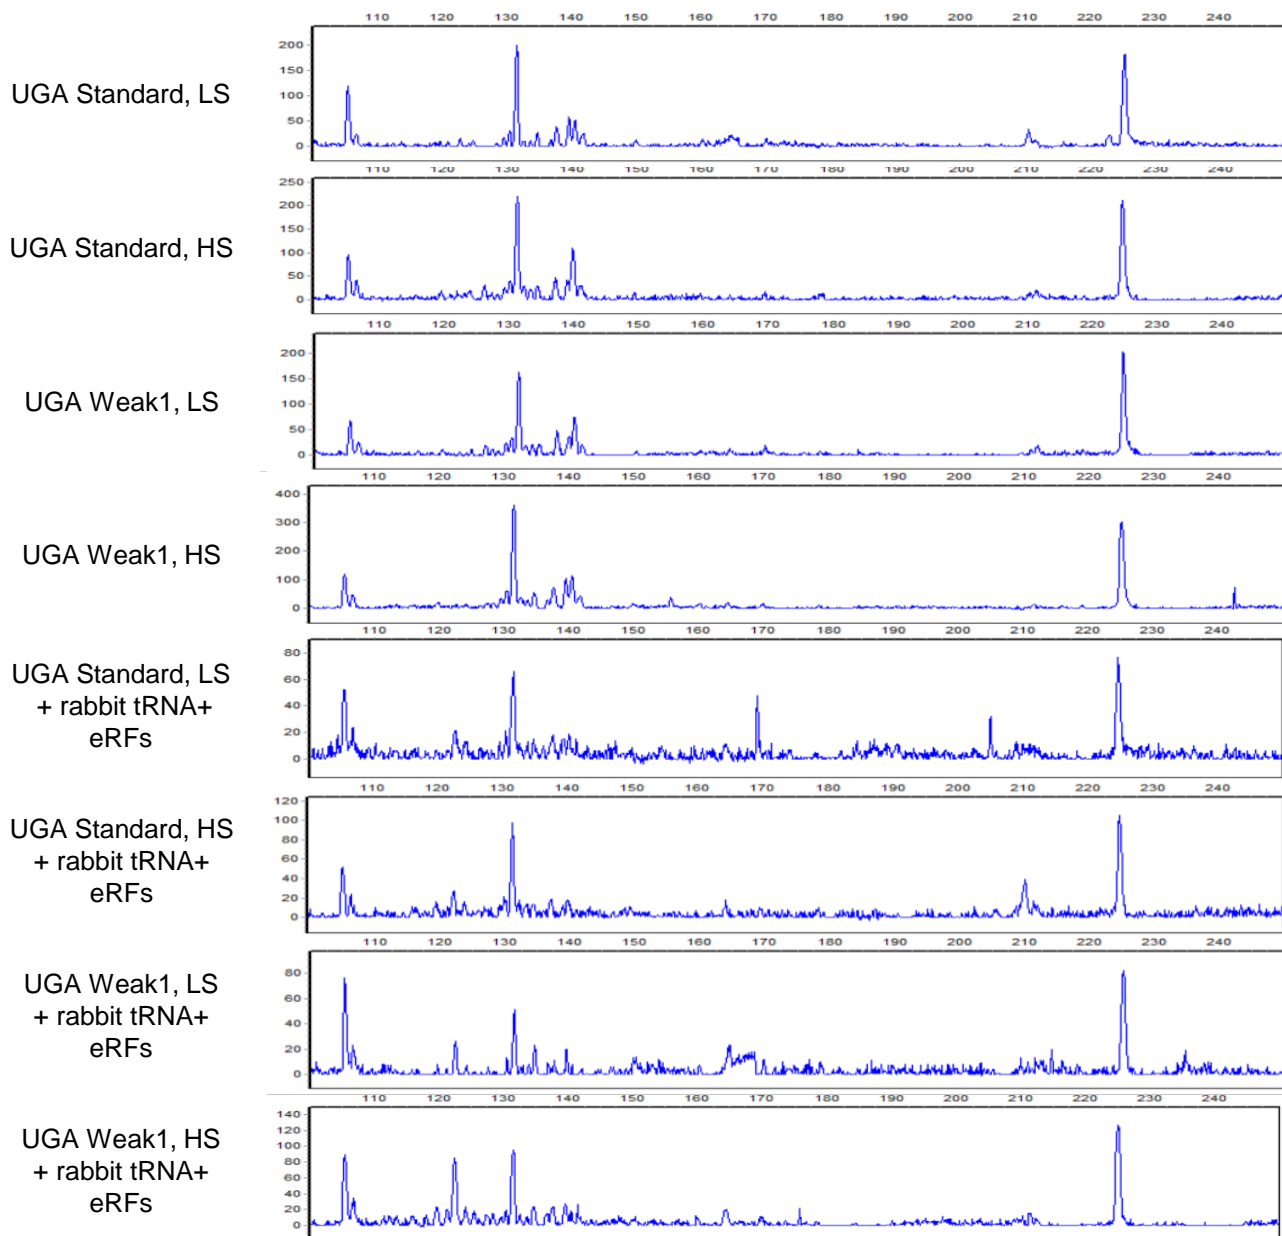

Figure S4. Examples of raw data for all toe-printing experiments.

# Raw data for Fig 5

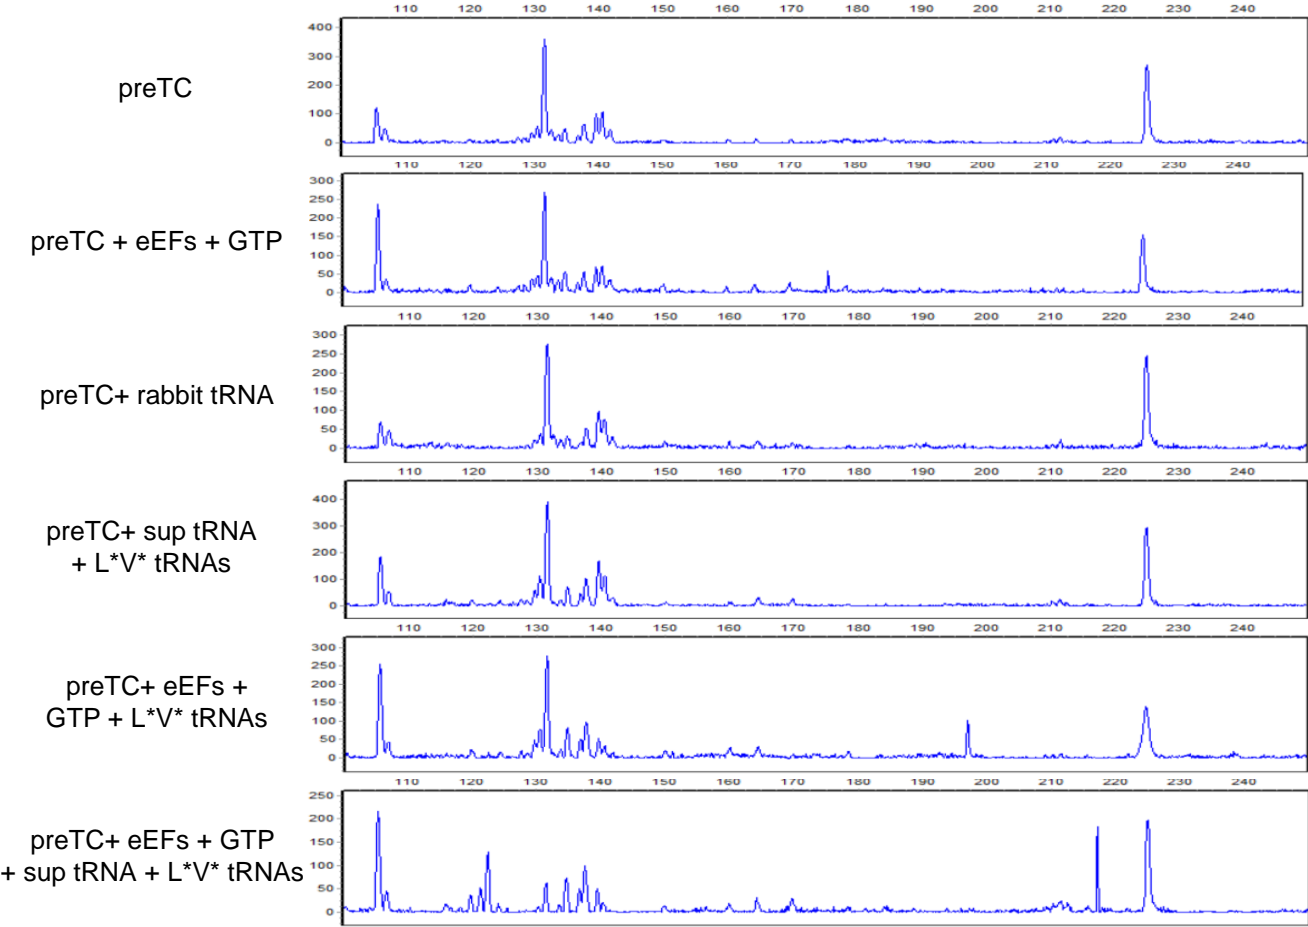

Figure S4. Examples of raw data for all toe-printing experiments.

# Raw data for Fig S1

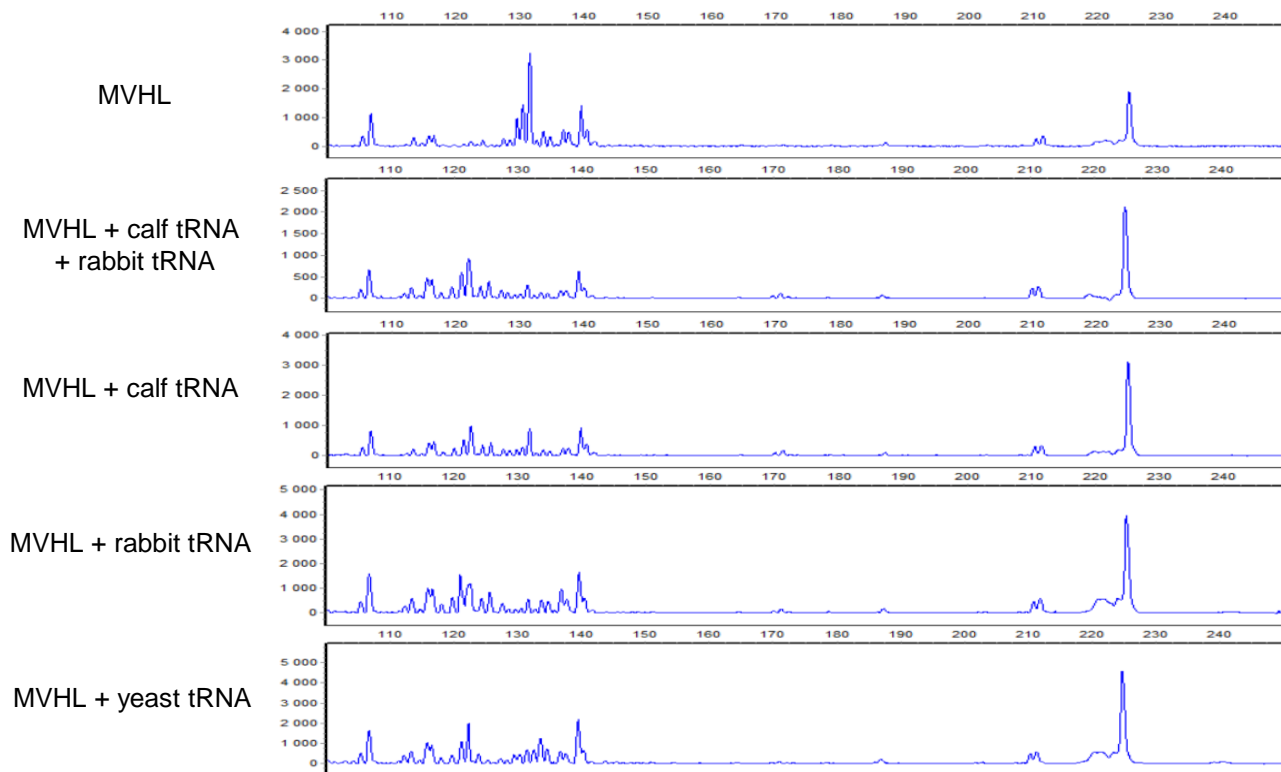

Figure S4. Examples of raw data for all toe-printing experiments.

# Raw data for Fig S2 (MVHL)

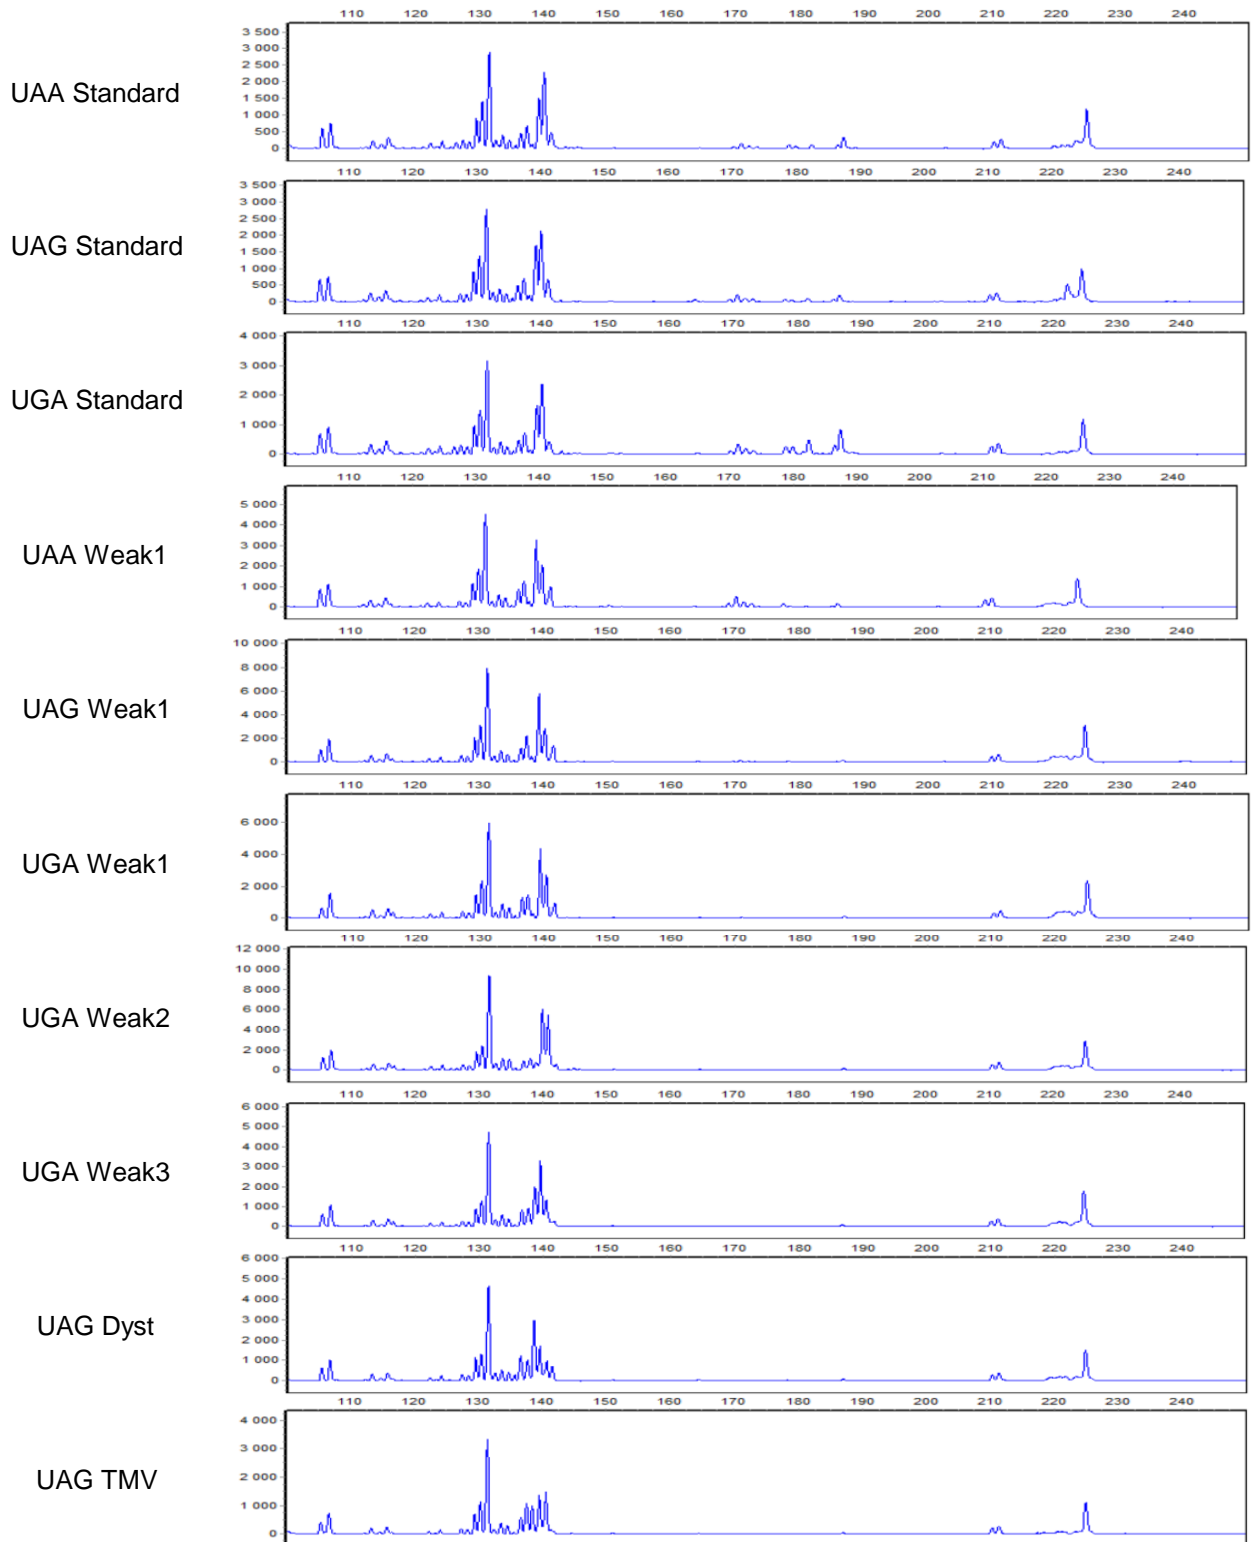

Figure S4. Examples of raw data for all toe-printing experiments.



# Raw data for Fig S2 (MVHL+rabbit tRNA)

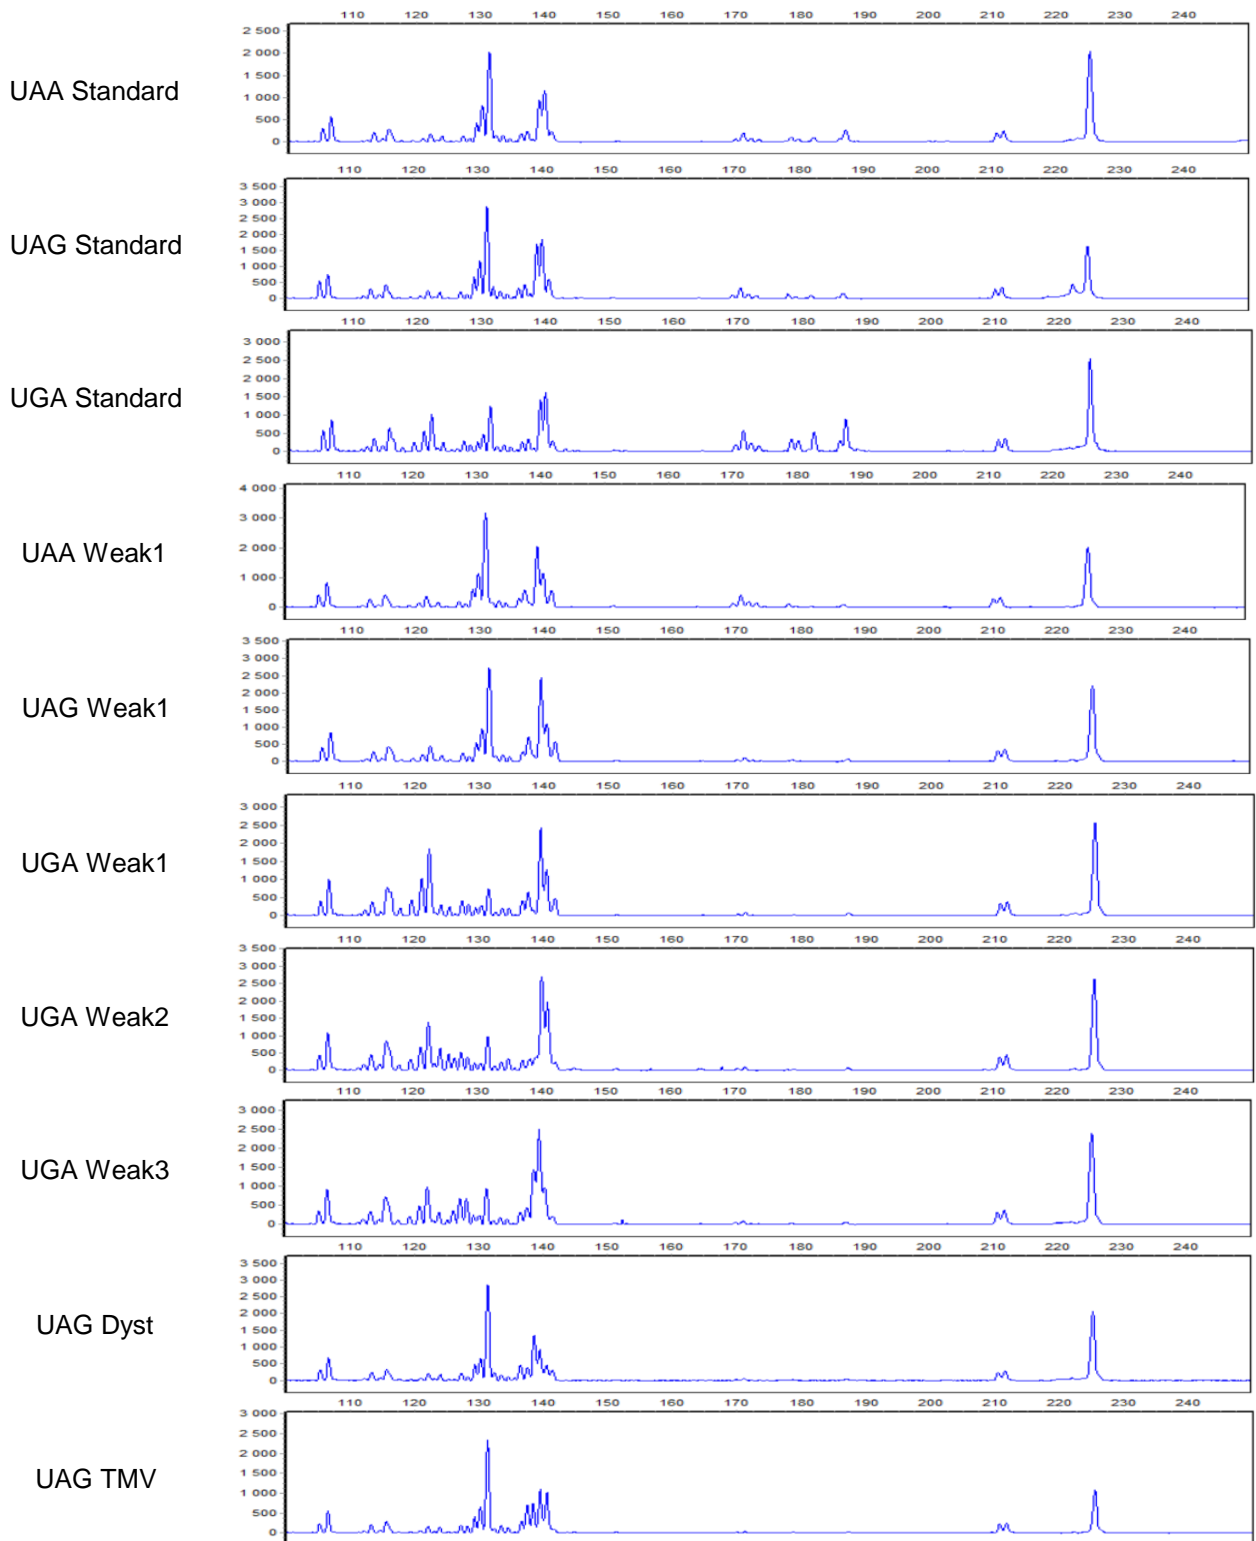

Figure S4. Examples of raw data for all toe-printing experiments.

# Raw data for Fig S3 (MVHL)

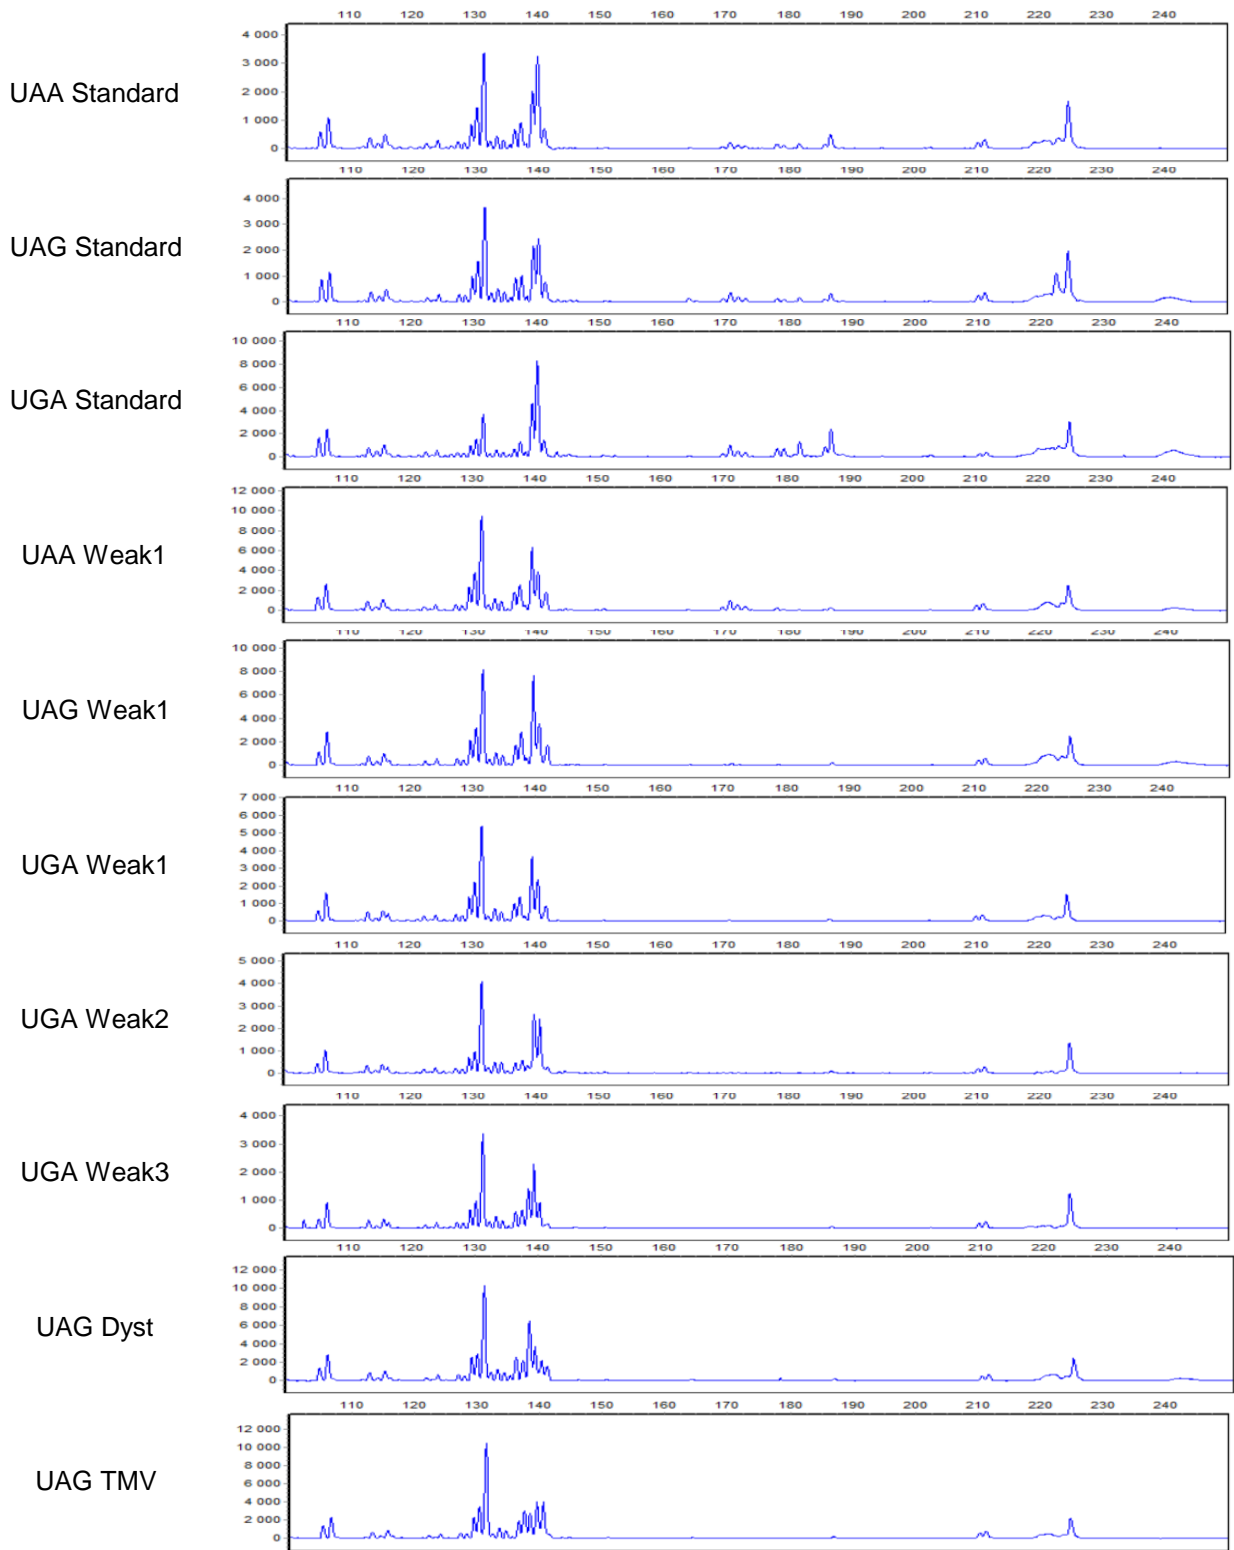

Figure S4. Examples of raw data for all toe-printing experiments.

# Raw data for Fig S3 (MVHL+eRF1+eRF3)

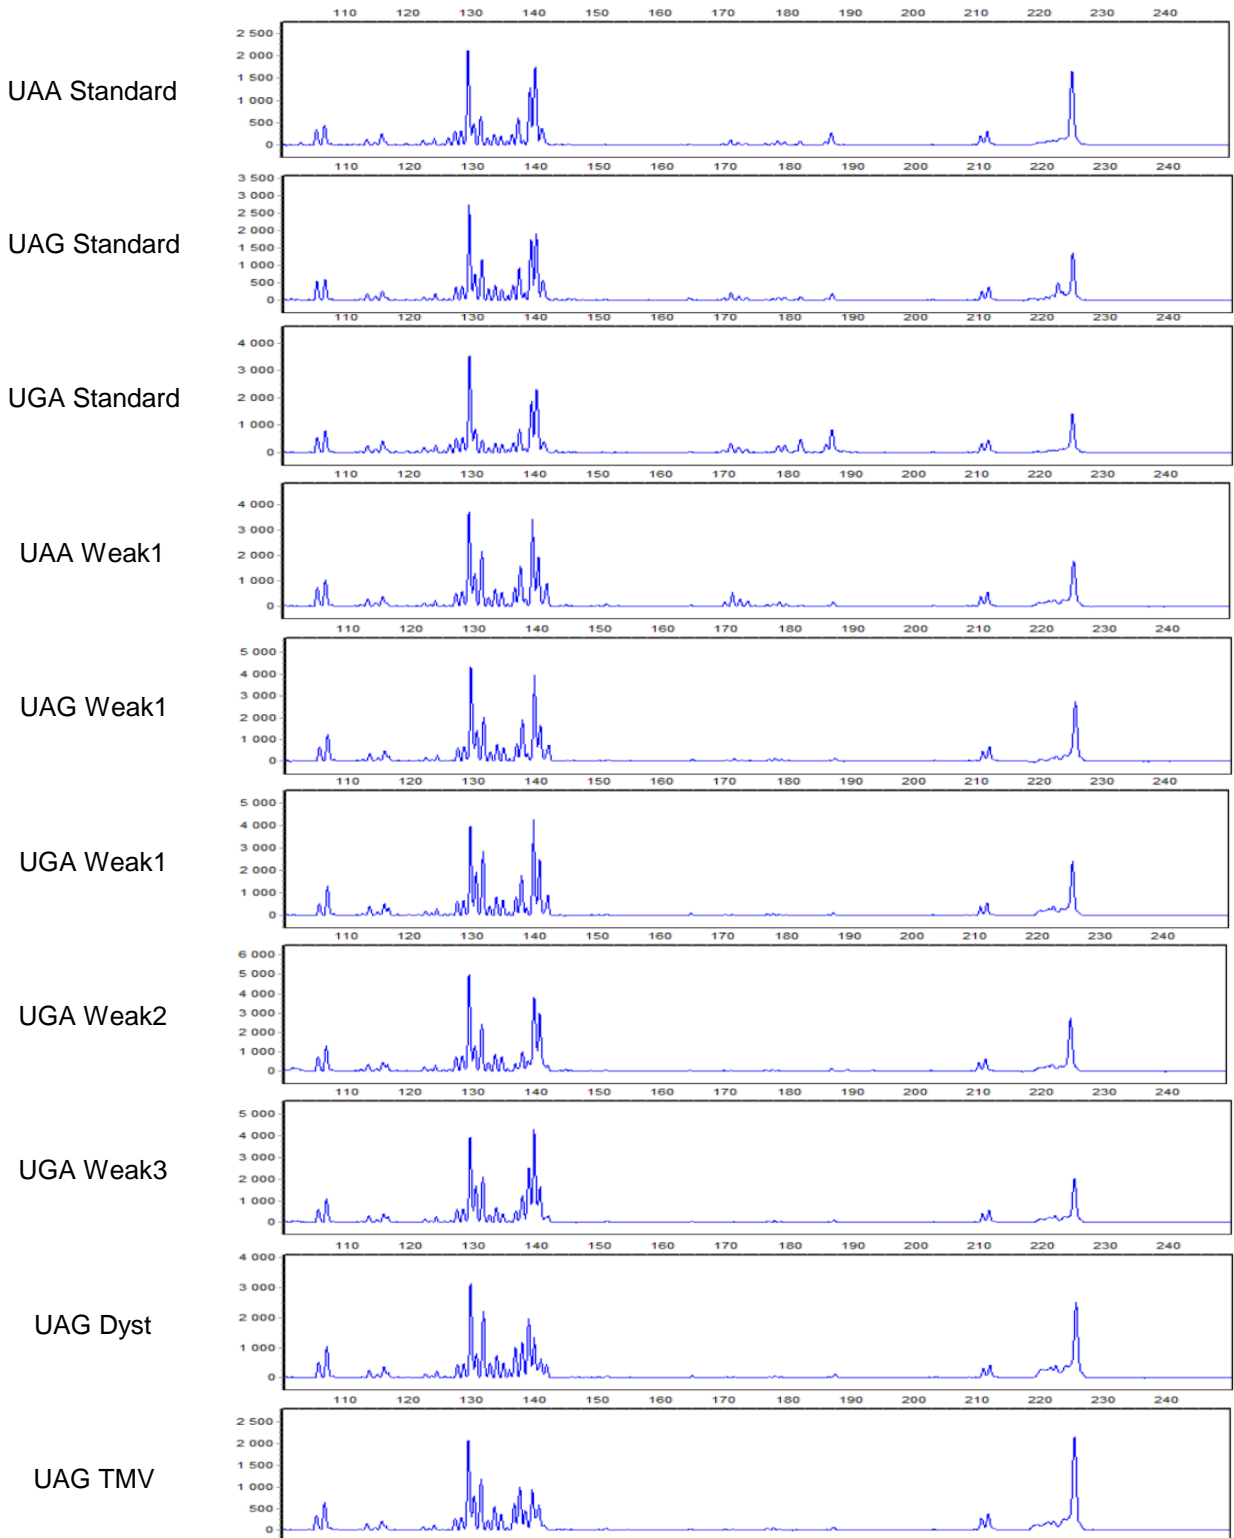

Figure S4. Examples of raw data for all toe-printing experiments.

# Raw data for Fig S3 (MVHL+rabbit tRNA)

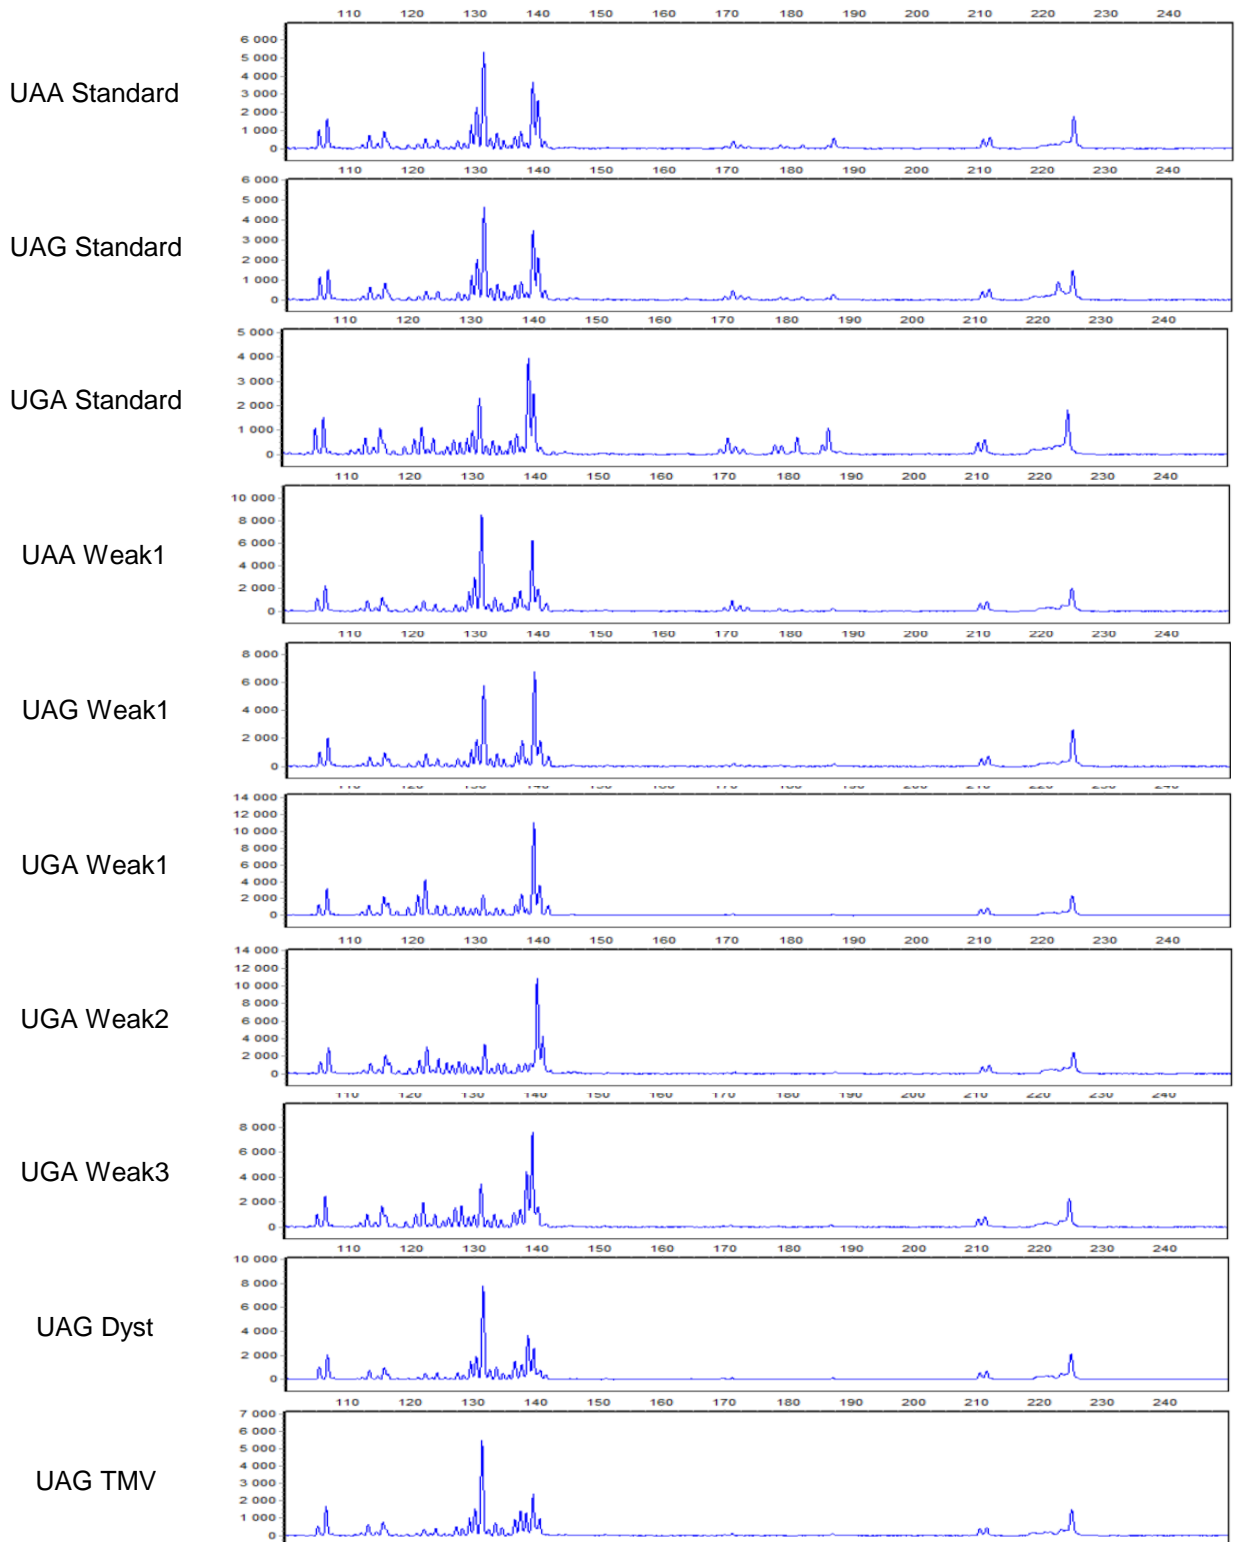

Figure S4. Examples of raw data for all toe-printing experiments.

# Raw data for Fig S3 (MVHL+rabbit tRNA+eRF1+eRF3)

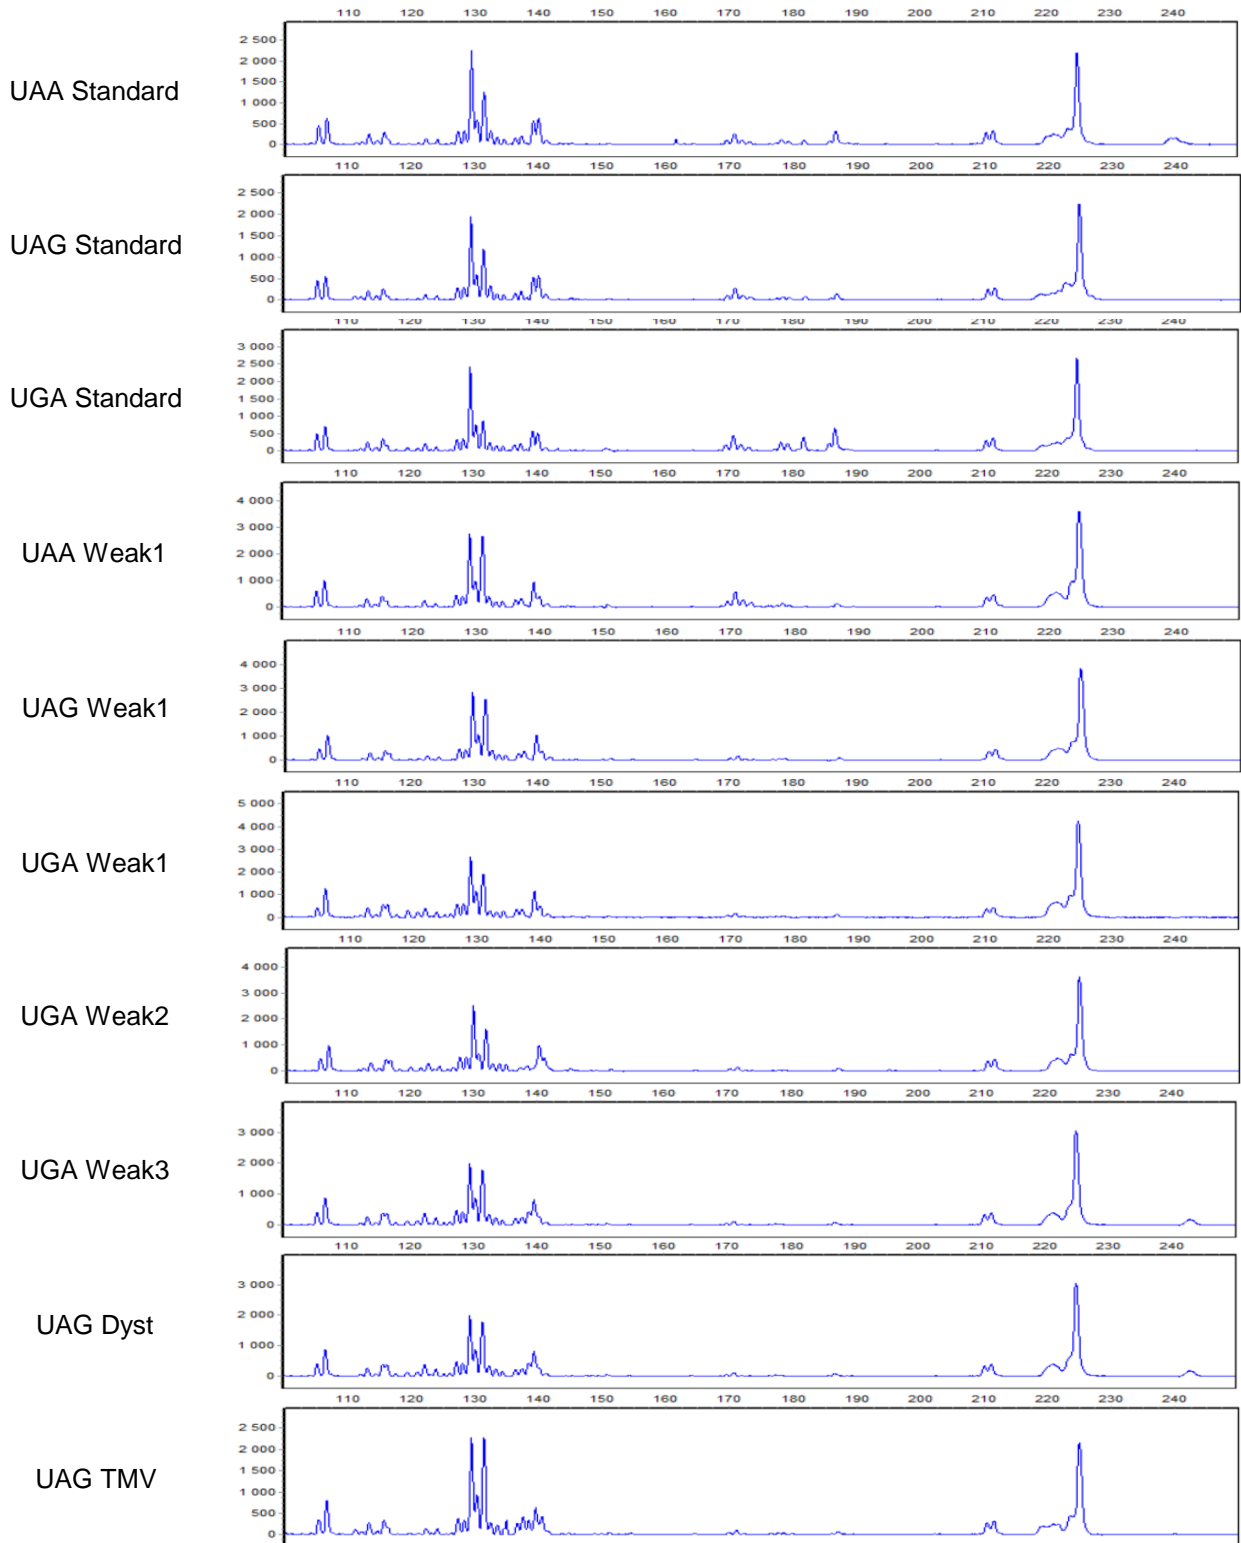

Figure S4. Examples of raw data for all toe-printing experiments.

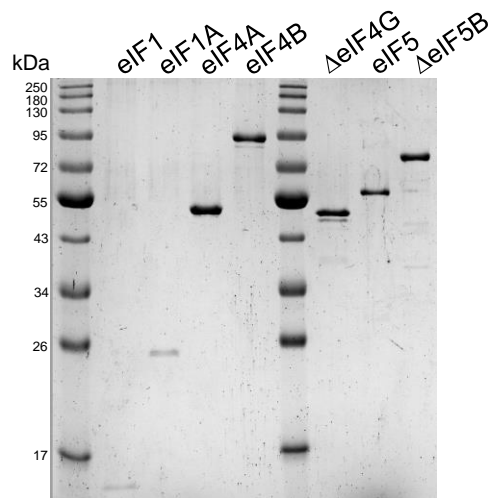

Figure S5. SDS-PAGE electrophoresis of recombinant eIFs used in the reconstituted eukaryotic translation system.

### UAA Standard (peak 1)

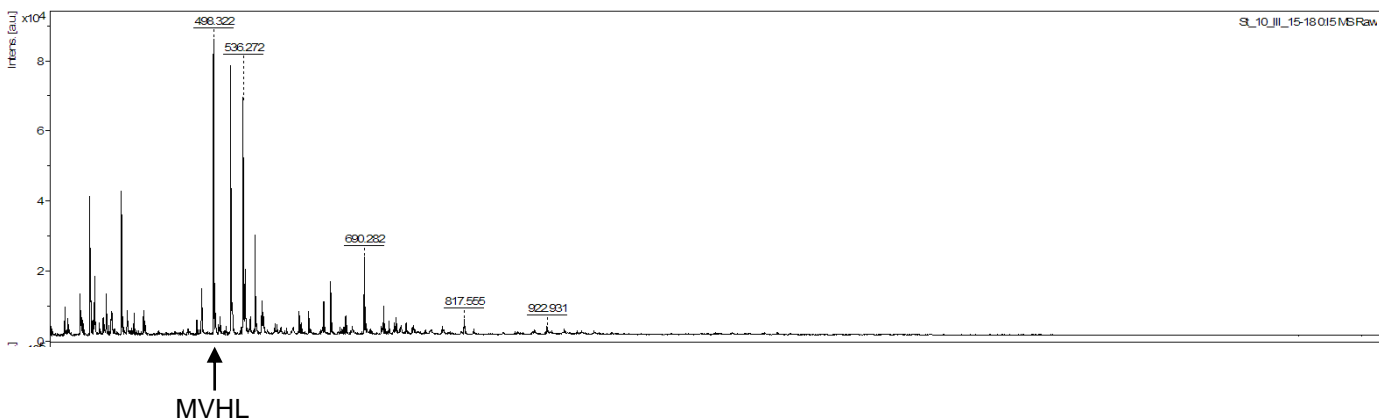

### UGA Weak1 (peak 1)

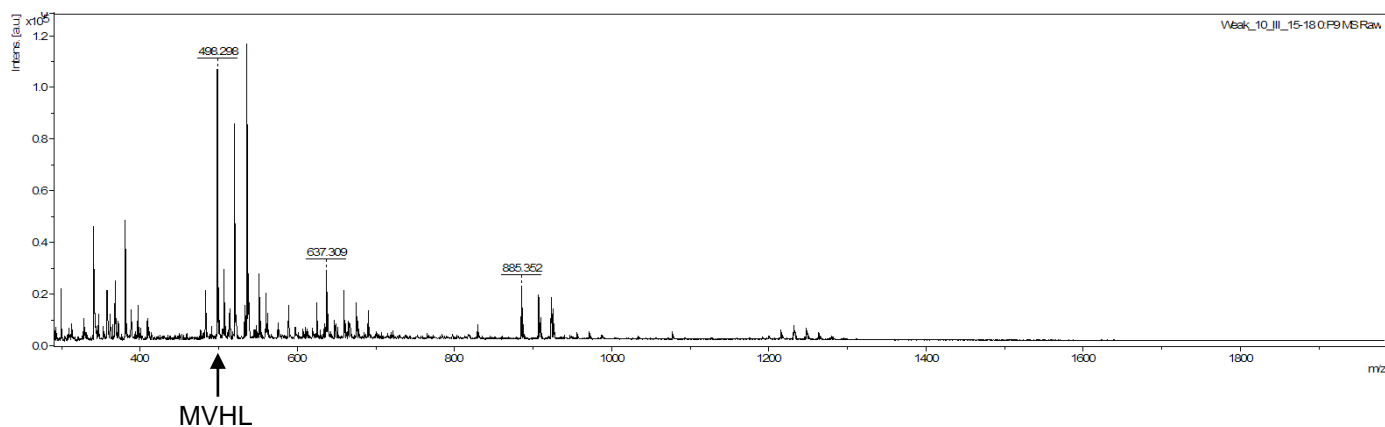

### UGA Weak 1 (peak 2)

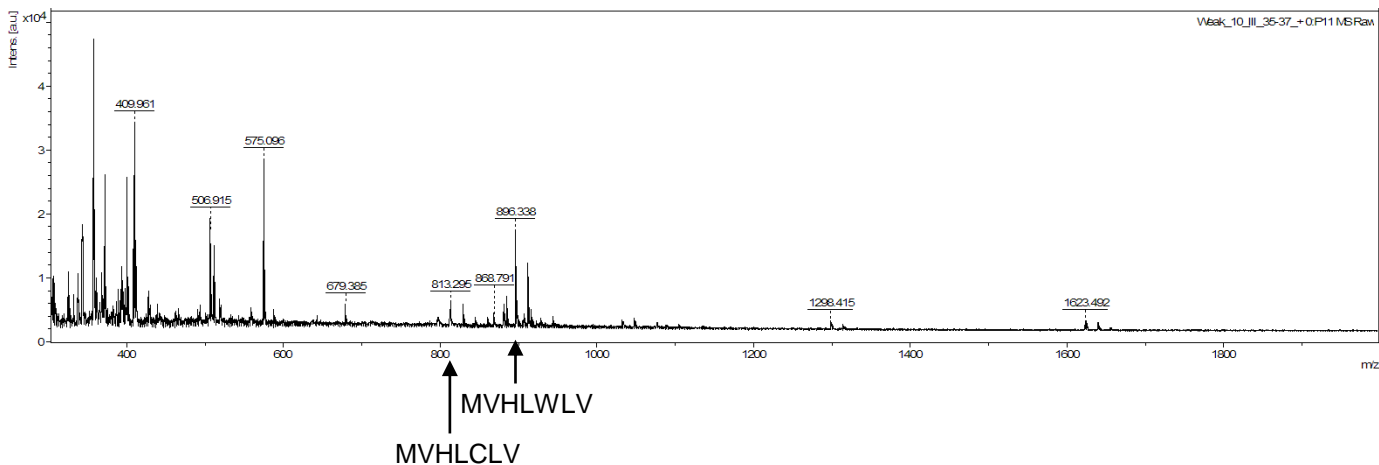

Figure S6. Raw data of MALDI-TOF MS of samples obtained in the radio RP-HPLC. The black arrows mark the peak corresponding to desired peptides.

### MVHL peptide

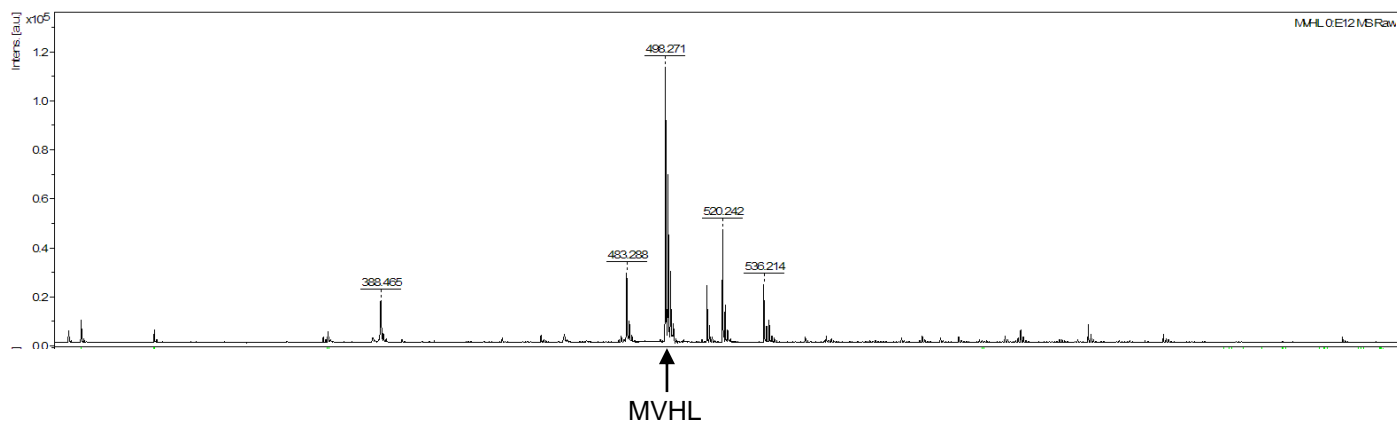

### MVHLCLV peptide

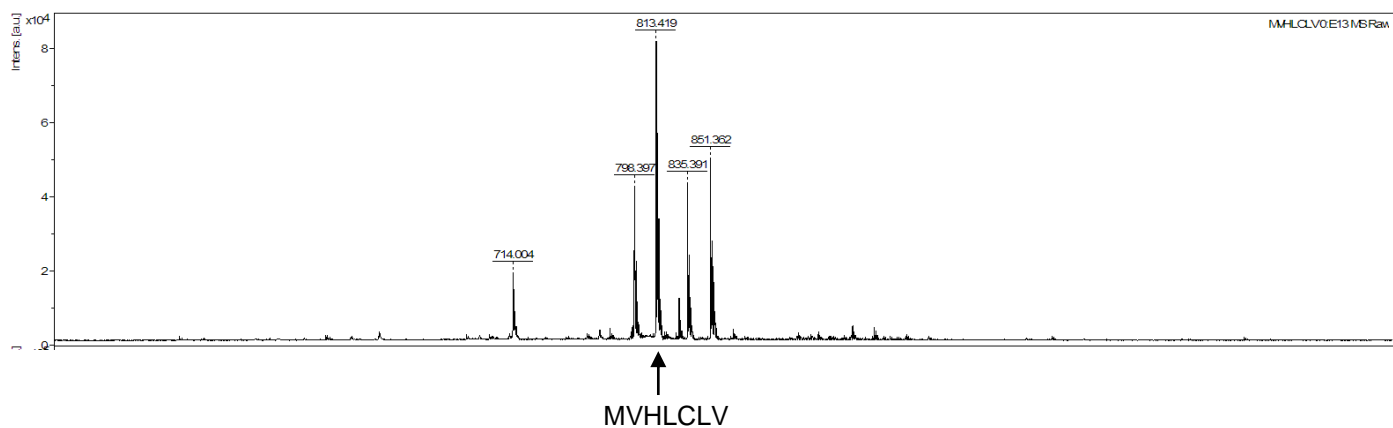

### MVHLWLV peptide

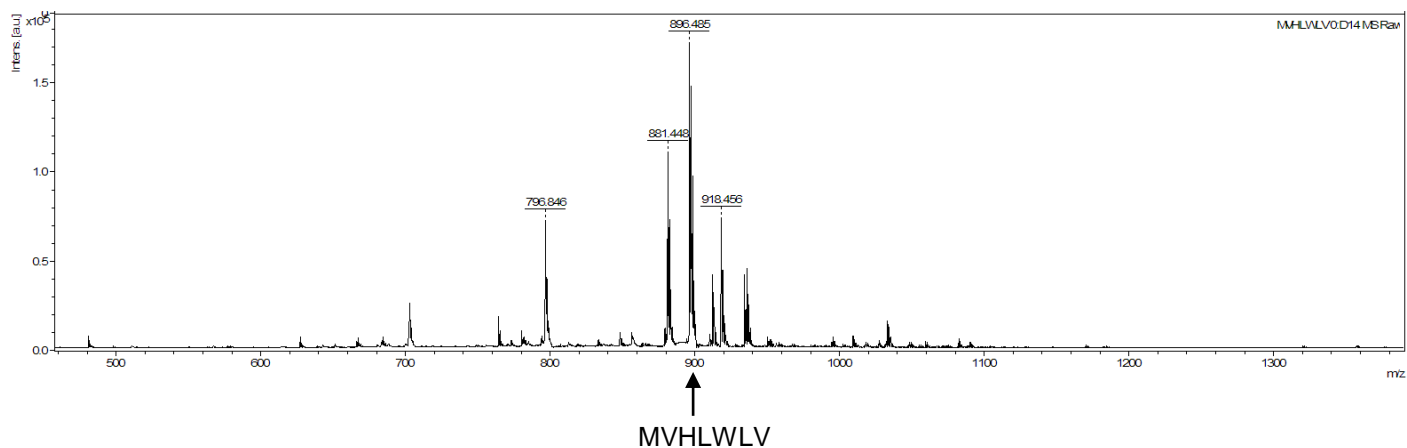

Figure S7. Raw data of MALDI-TOF MS of commercially synthesized MVHL, MVHLCLV and MVHLWLV tetra- and heptapeptides. The black arrows mark the peak corresponding to desired peptide.
